# Supplementary material for: Epigenetic Repression of RUNX2 and OSX Promoters Controls the Nonmineralized State of the Periodontal Ligament
Source: MDPI journal article supplement (doi:10.3390/genes14010201), 2023-01-12
Supplement: s1 [file s1]

## Supplemental Table S1

### RT-qPCR AND CHIP OLIGOS USED IN THE STUDY

| OLIGOS FOR <i>RUNX2</i> and <i>OSX</i> PROMOTER ChIP |         |                        |
|------------------------------------------------------|---------|------------------------|
| <b><i>RUNX2</i></b>                                  |         |                        |
| ChIP A                                               | Forward | GAATCGCTTCTCGGAGTCAC   |
|                                                      | Reverse | TTTCCCACGTTTCTCTCCAC   |
| ChIP B                                               | Forward | GCAGGAACGTGGAGAGAAAC   |
|                                                      | Reverse | TCCTTCCTAATTGGGGCTTT   |
| ChIP C                                               | Forward | CCCAAGCTCATCTTGTACTCG  |
|                                                      | Reverse | CCTAGAAGGGGCCTGGAA     |
| ChIP D                                               | Forward | GCGTTTGCACTGAGCAATAA   |
|                                                      | Reverse | CCTCGAAGCATCAAGGAAGA   |
| ChIP E                                               | Forward | CGCAAACACGTTTTCAAGC    |
|                                                      | Reverse | GGAAATCCGCTTGAGGCTAT   |
| ChIP F                                               | Forward | CAGAGTTTGAGGCTGGTCGT   |
|                                                      | Reverse | TTTGGAGGCTGGGATTTCTA   |
| ChIP G                                               | Forward | TTTAATTTTCCCCGTGAGC    |
|                                                      | Reverse | AAGTTGCAAAACCCTTGCTG   |
| ChIP H                                               | Forward | ACCCAAACCCTGCAAAATCT   |
|                                                      | Reverse | TTCTTGAGCCTCTGTGCTGA   |
| <b><i>OSX</i></b>                                    |         |                        |
| ChIP A                                               | Forward | TGTGTGTCCGTCTGTGTTCA   |
|                                                      | Reverse | GAGAGACTGGAACGCACTGA   |
| ChIP B                                               | Forward | CTCCACCTCAGAACCTTCCA   |
|                                                      | Reverse | CAGTCACCCACCTGCCTCTA   |
| ChIP C                                               | Forward | GGCCTAGGTATCACCTCCAA   |
|                                                      | Reverse | GAGGTTGGTTCCAGAGCAAG   |
| ChIP D                                               | Forward | TTGGTTACCCAGGGATGGTA   |
|                                                      | Reverse | GTGGCGGTAGAAGGTCATTG   |
| ChIP E                                               | Forward | TTTGGGTTTCCCTCCTAACC   |
|                                                      | Reverse | TCTCATTGCCATGCATCAAT   |
| ChIP F                                               | Forward | GGGCTTTATTCCCCTGACA    |
|                                                      | Reverse | GAGGACTGGGCAGCTAAGTG   |
| ChIP G                                               | Forward | TCTATCAGCCACCTGGTTCC   |
|                                                      | Reverse | CAGCAGGTAGGCACCAATTT   |
| ChIP H                                               | Forward | TCCCCATCTTTGTTCCCTCTG  |
|                                                      | Reverse | GAAGACCAGATGTGTGGCTTTA |

| OLIGOS FOR REAL TIME PCR ANALYSIS |         |                         |
|-----------------------------------|---------|-------------------------|
| <b><i>BMP2</i></b>                | Forward | TCAAGCCAAACACAAACAGC    |
|                                   | Reverse | AGCCACAATCCAGTCATTCC    |
| <b><i>RUNX2</i></b>               | Forward | GTGCCTAGGCGCATTTC       |
|                                   | Reverse | GCTCTTCTTACTGAGAGTGAAGG |
| <b><i>OSX</i></b>                 | Forward | TACCCCATCTCCCTTGACTG    |
|                                   | Reverse | GCAACAGGGGATTAACCTGA    |
| <b><i>IBSP</i></b>                | Forward | AACCTACAACCCACACAA      |
|                                   | Reverse | CGTACTCCCCCTCGTATTCA    |
| <b><i>ALP</i></b>                 | Forward | CAACCCTGGGGAGGAGAC      |
|                                   | Reverse | GCATTGGTGTTGTACGTCTTG   |
| <b><i>GAPDH</i></b>               | Forward | ACAGTCAGCCGCATCTTCTT    |
|                                   | Reverse | ACGACCAAATCCGTTGACTC    |
